# Supplementary material for: CTCF-mediated chromatin looping provides a topological framework for the formation of phase-separated transcriptional condensates
Source: PubMed Central journal article supplement — Nucleic Acids Res. 2021 Dec 20;50(1):207–26. doi: 10.1093/nar/gkab1242 (PMC8855298; doi:10.1093/nar/gkab1242), 2021-12-20
Supplement: gkab1242_Supplemental_File.pdf [file gkab1242_Supplemental_File.pdf]

## SUPPLEMENTARY DATA

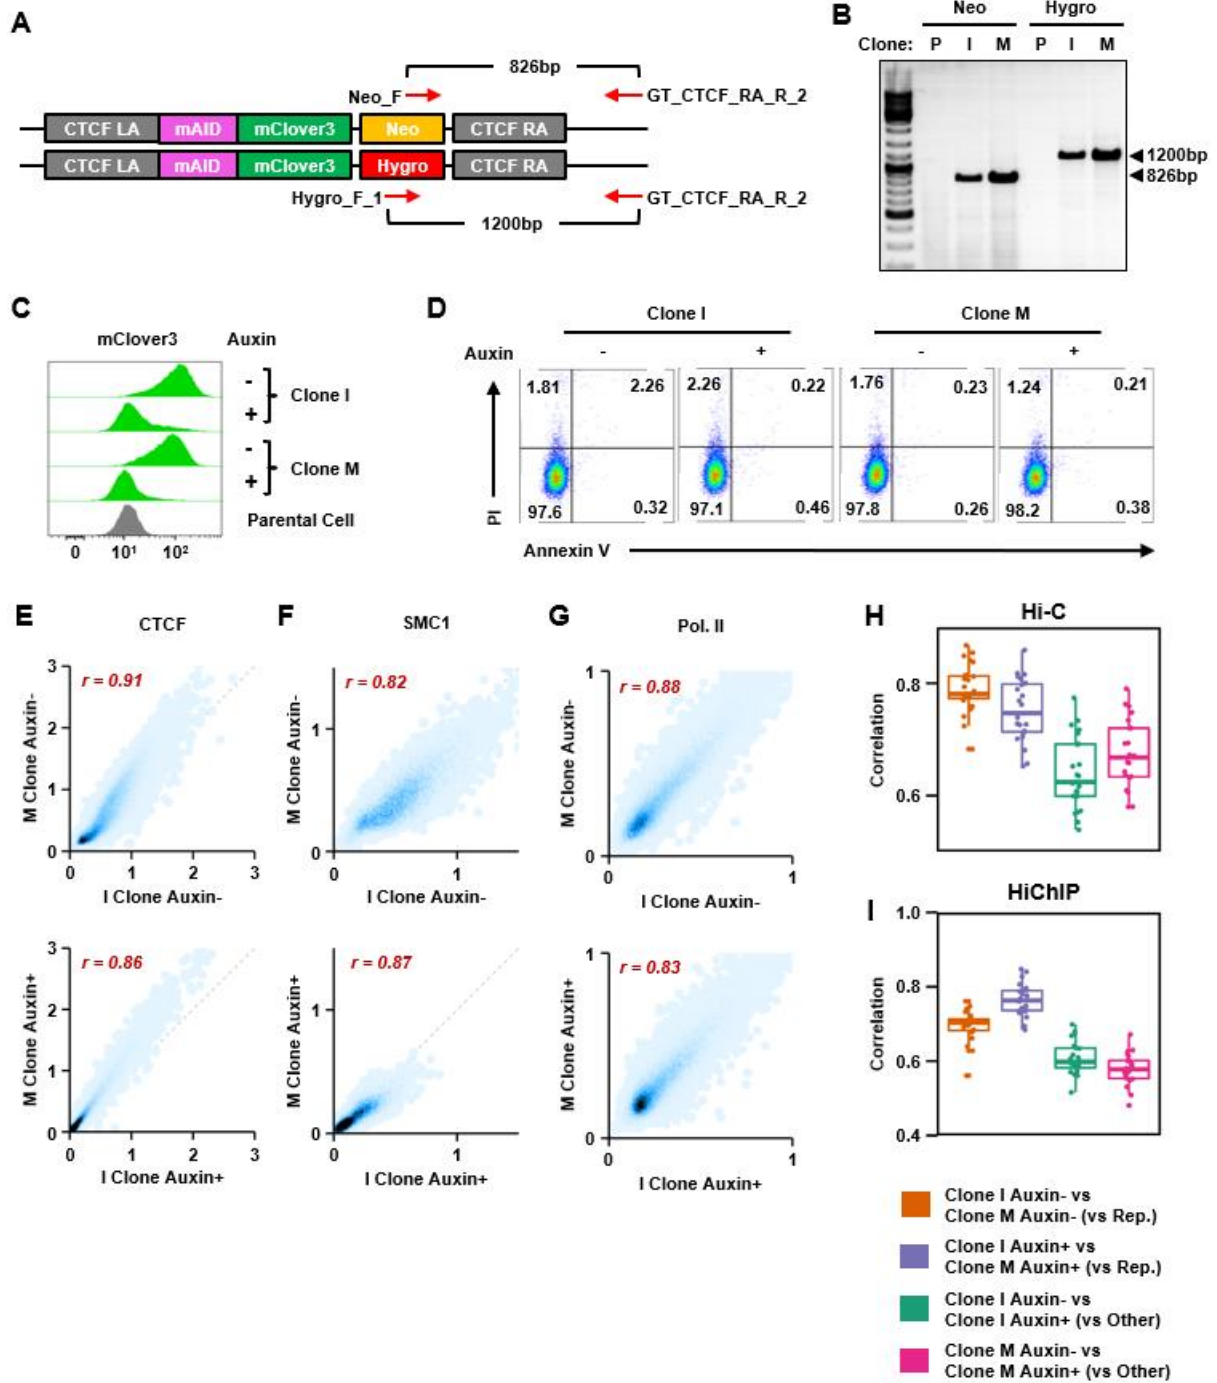

### Supplementary Figure S1

(A) Schematic diagram of genotyping by PCR to identify successful knock-in of the mAID-mClover3 cassette to the C-terminus of human *CTCF* before the stop codon in both alleles of

HCT116 cells. Primer sets and expected PCR products are shown. **(B)** Genomic PCR to test the genotype of I and M clones after selection with both G418 and hygromycin. P: Parental cells (HCT116/CMV-OsTIR1). **(C)** Flow cytometric analysis for mClover3 to determine the degradation efficiency of the CTCF-mAID-mClover3 fusion protein upon auxin treatment. Parental cells: HCT116/CMV-OsTIR1. **(D)** Flow cytometric analysis for apoptosis of I and M clones with or without auxin treatment. **(E-G)** Scatter plots show correlations for ChIP-seq signals for (E) CTCF, (F) SMC1, and (G) Pol II between biological replicate cells with (bottom) and without (top) auxin treatment. **(H-I)** Reproducibility analysis of (H) Hi-C and (I) Pol II-HiChIP data in each biological replicate (N=2). Each dot represents a reproducibility score for one chromosome.

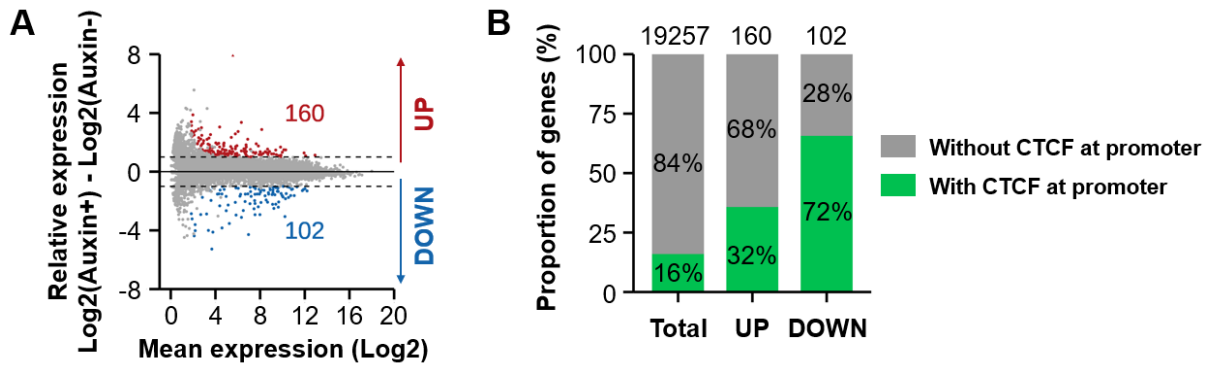

### Supplementary Figure S2

(A) RNA-seq MA plot of untreated versus CTCF-depleted cells. The number of genes exhibiting >2-fold increases (red) or decreases (blue) among CTCF-depleted cells with a false discovery rate <0.01 is indicated. (B) Proportion of genes with (green) or without (gray) CTCF bound within 2 kb of the transcription start site prior to depletion. The number of genes for each group is listed on top of the bars.

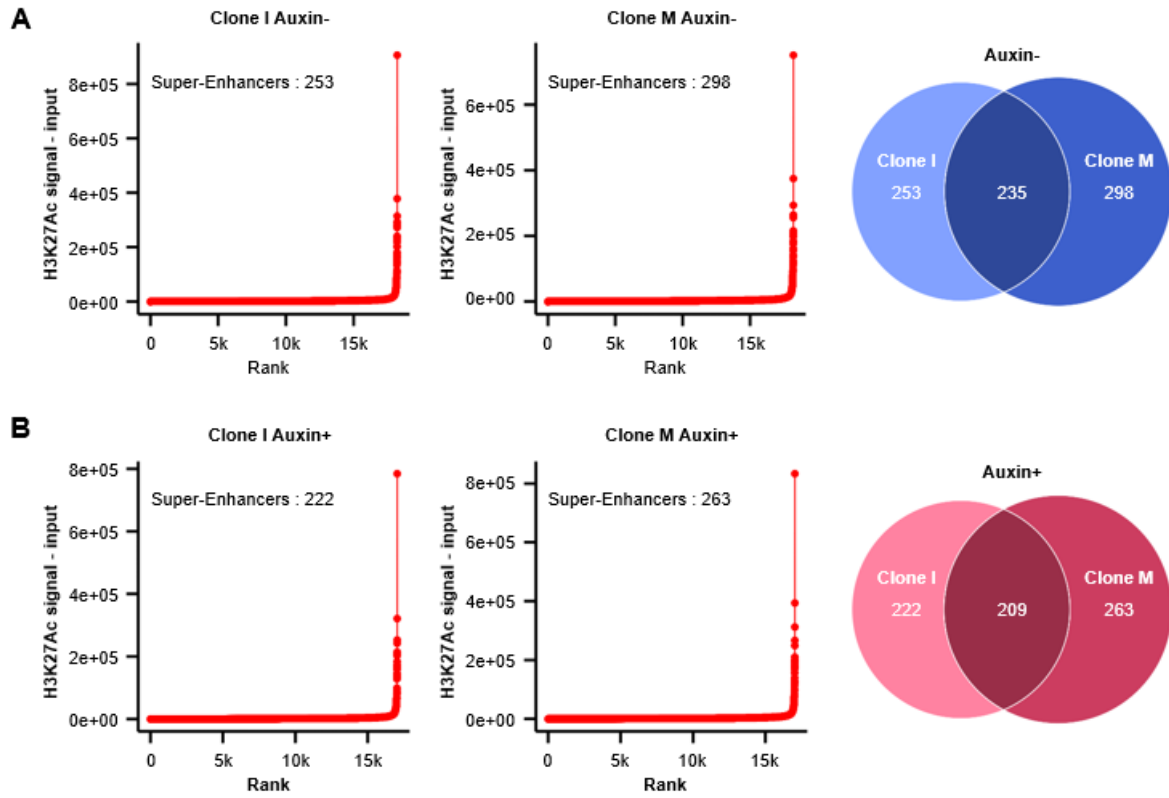

### Supplementary Figure S3

Line graphs presenting the number of super-enhancers according to ranked H3K27ac occupancy signals in individual biological replicates **(A)** without and **(B)** with auxin treatment. super-enhancers called from both replicates in each condition were used for subsequent analysis.

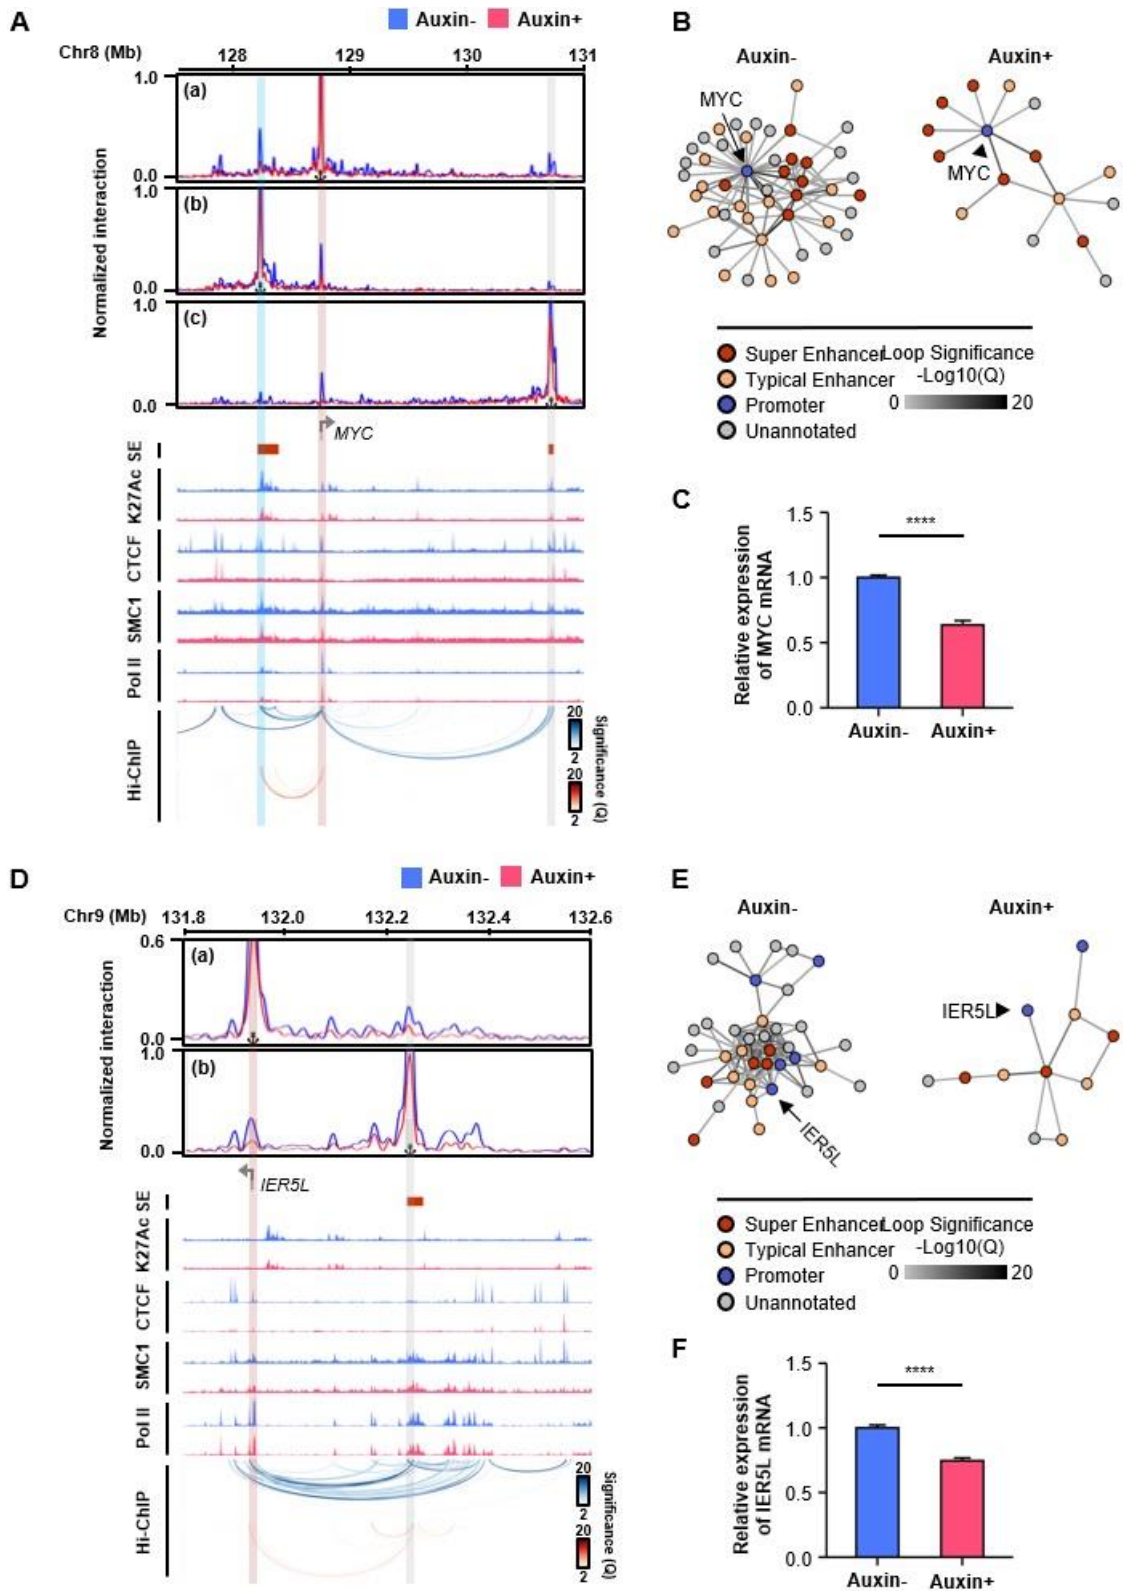

Supplementary Figure S4

(A and D) Snapshots of virtual 4C plots, ChIP-seq signal tracks, and Pol II HiChIP loops (from

top to bottom) at *MYC* (A) and *IER5L* (D) loci with and without auxin treatment. Virtual 4C plots show normalized Pol II HiChIP loop strength with the transcription start site (a), proximal super-enhancer (b), and distal super-enhancer (c) as viewpoints. The locations of super-enhancers are shown on top of H3K27ac ChIP-seq signal tracks. The locations of TAD boundaries are shown on top of Pol II HiChIP loops. Orange vertical bars highlight the locations of the viewpoints at the transcription start site. Sky and gray vertical bars highlight the locations of the viewpoints at super-enhancers. **(B and E)** 3D cliques in the *MYC* (B) and *IER5L* (E) loci, wherein each edge represents a significant Pol II-mediated chromatin interaction. The color of each edge indicates loop strength ( $-\text{Log}_{10}(Q)$ ). The color of each node represents promoter, typical enhancer, super-enhancer, or unannotated regions. **(C and F)** Decreased mRNA expression of *MYC* (C) and *IER5L* (F) upon CTCF depletion was validated with qRT-PCR.

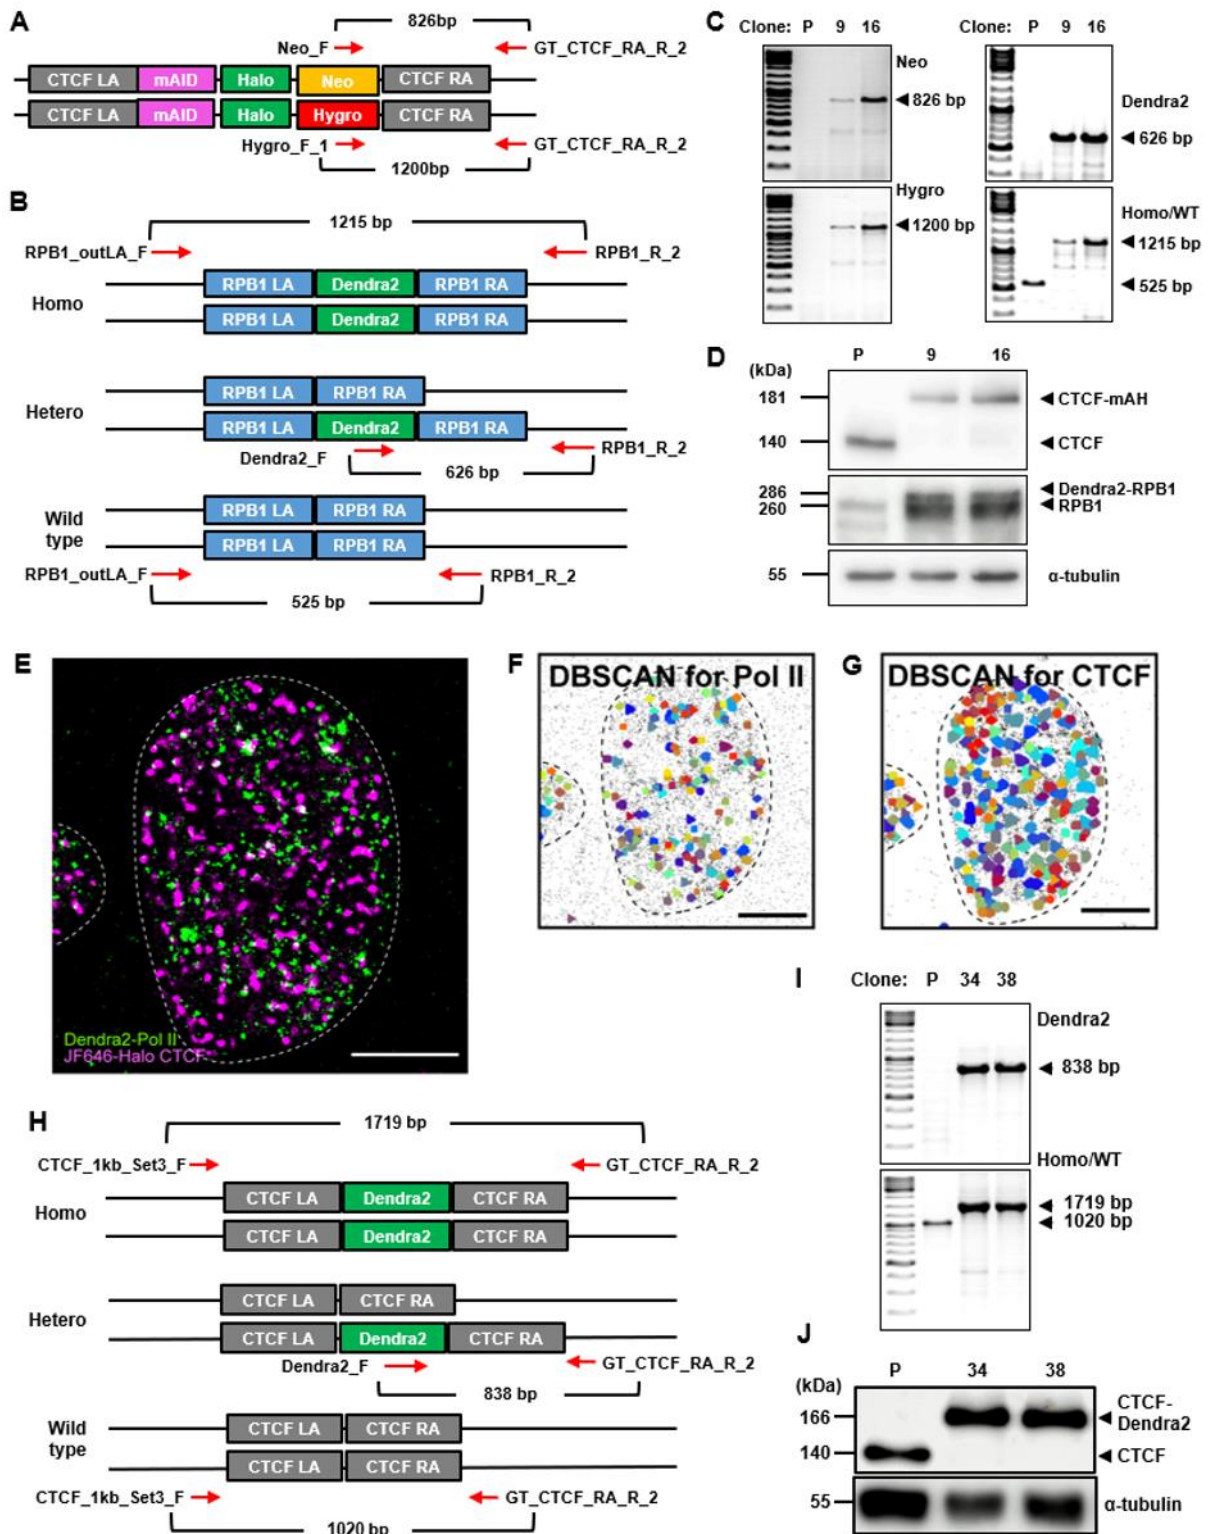

Supplementary Figure S5

(A) Schematic diagram of genotyping by PCR to identify successful knock-in of the mAID-Halo cassette to the C-terminus of human *CTCF* before the stop codon in both alleles of

HCT116 cells. Primer sets and expected PCR products are shown. **(B)** Schematic diagram of genotyping by PCR to identify successful knock-in of Dendra2 to the N-terminus of human *RPB1* before the start codon in both alleles of HCT116 cells. Primer sets and expected PCR products are shown. **(C)** Genomic PCR to test the genotype of clones after selection. P: Parental cells (HCT116/CMV-OsTIR1). **(D)** Immunoblotting analysis for CTCF and RPB1 to identify the CTCF-mAID-Halo (CTCF-mAH) and Dendra2-RPB1 fusion protein. Parental cells: HCT116/CMV-OsTIR1. **(E)** A super-resolved merged image of JF646-CTCF (magenta) and Dendra2-Pol II (green). From localization of individual fluorescence, **(F)** Pol II clusters and **(G)** CTCF clusters were defined using the DBSCAN algorithm. Scale bars represent 5  $\mu\text{m}$ . **(H)** Schematic diagram of genotyping by PCR to identify successful knock-in of Dendra2 to the C-terminus of human *CTCF* before the stop codon in both alleles of HCT116 cells. Primer sets and expected PCR products are shown. **(I)** Genomic PCR to test the genotype of clones after selection. P: Parental cells (HCT116/CMV-OsTIR1). **(J)** Immunoblotting analysis for CTCF to identify the CTCF-Dendra2 fusion protein. Parental cells: HCT116/CMV-OsTIR1.



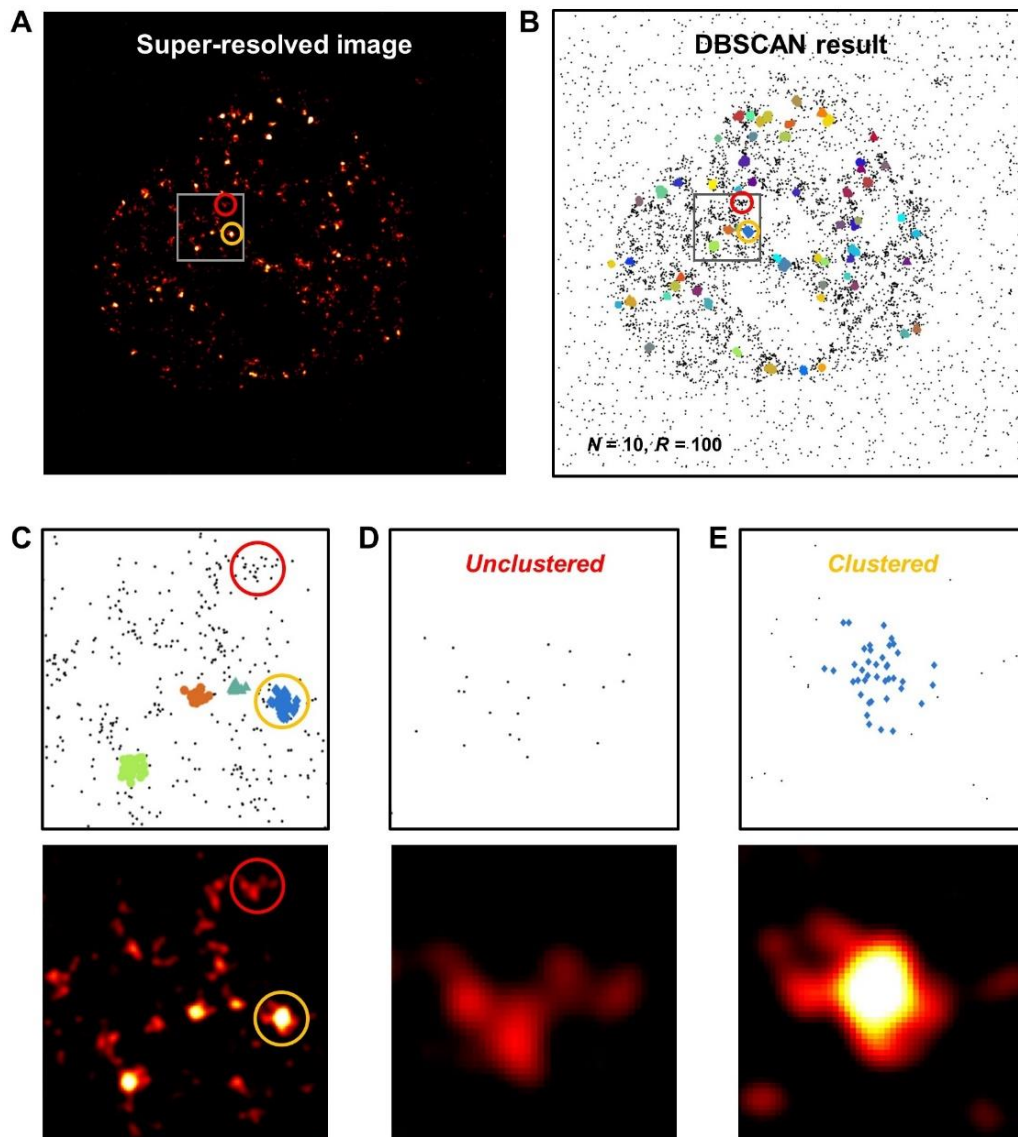

### Supplementary Figure S6

(A and B) Representative super-resolved color code image (A) and the pointillist image (B) for Dendra2-Pol II where localization-dense regions defined as “unclustered” and “clustered” were indicated with red and yellow circles, respectively. (C – E) Progressively zoomed-in pointillist image (top) and super-resolved color code image (bottom) for Dendra2-Pol II. (C) Zoomed-in images for the gray box of panel B. (D and E) Zoomed-in images for the red (D) and yellow (E) circles of panel C. Estimation by DBSCAN with  $N = 10$  and  $R = 100$  nm shows 71 Pol II clusters at this 2D focal plane.

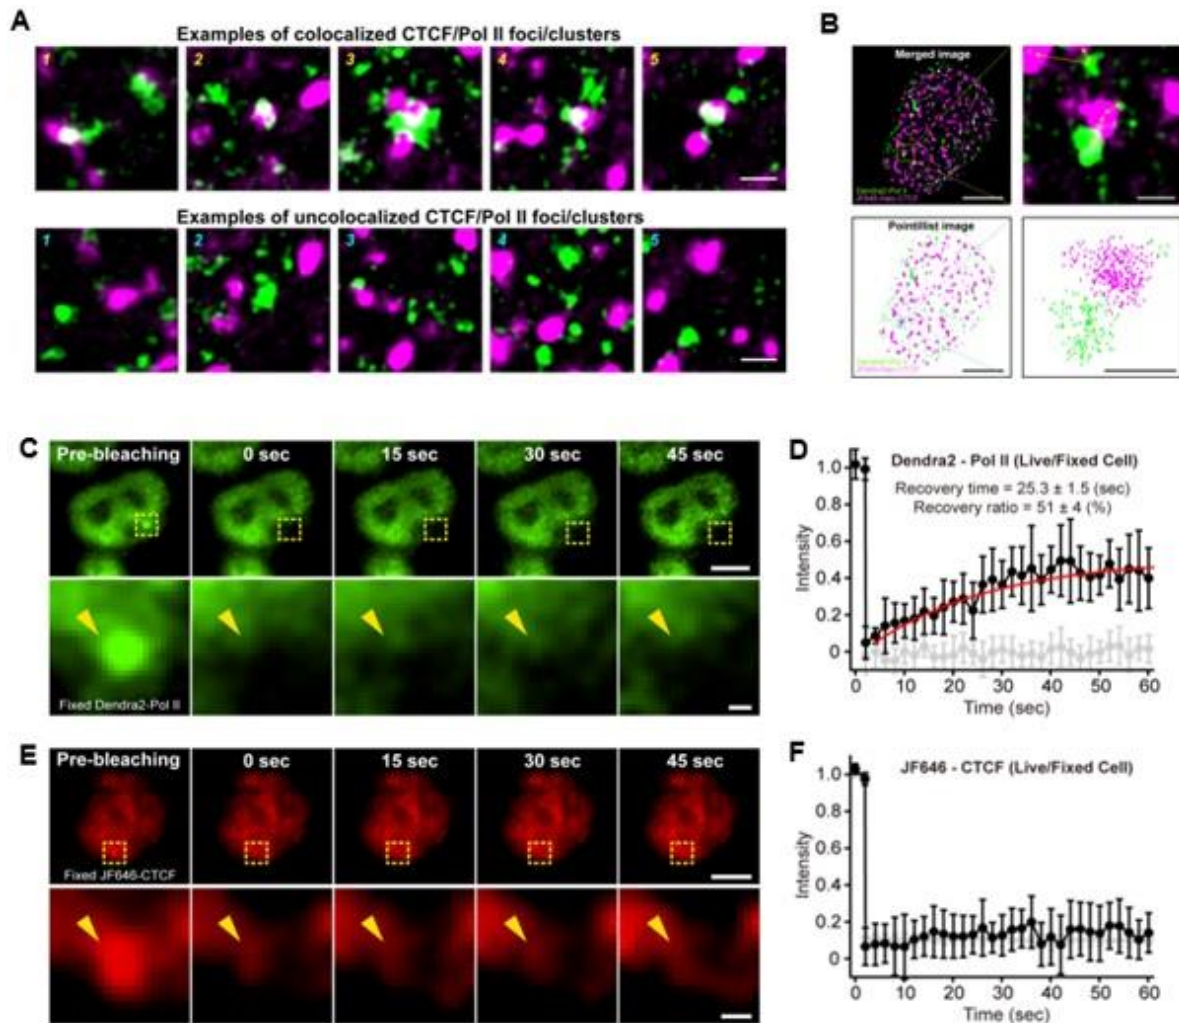

### Supplementary Figure S7

(A) Examples of colocalized and un-colocalized CTCF/Pol II clusters. (B) Analysis of center-to-center distances between CTCF/Pol II clusters defined using the DBSCAN algorithm. A representative merged super-resolved image shows (magenta) JF646-CTCF and (green) Dendra2-Pol II clusters in a cell nucleus. The enlarged image shows the region demarcated by the dotted box drawn in the merged image. Yellow arrows represent the distance between adjacent CTCF and Pol II clusters. Pointillist images represent localizations of stochastic fluorescent signals. (C) An example of the FRAP experiment for a Pol II cluster in a fixed cell at 15-sec intervals. The yellow dotted box indicates a photobleached region in the upper panel. Fluorescence of bleached Pol II clusters did not recover in fixed cells, unlike live cells. (D)

Normalized fluorescence intensities over time for Pol II clusters in live cells (black) and fixed cells (grey) during FRAP experiments. **(E)** An example of the FRAP experiment for a CTCF cluster in a fixed cell at 15-sec intervals. **(F)** Normalized fluorescence intensities over time for CTCF clusters in live cells (black) and fixed cells (grey) during FRAP experiments. Fluorescence of bleached CTCF clusters did not recover in either fixed or live cells. Scale bars represent 5  $\mu\text{m}$  (upper panels) and 500 nm (lower panels).

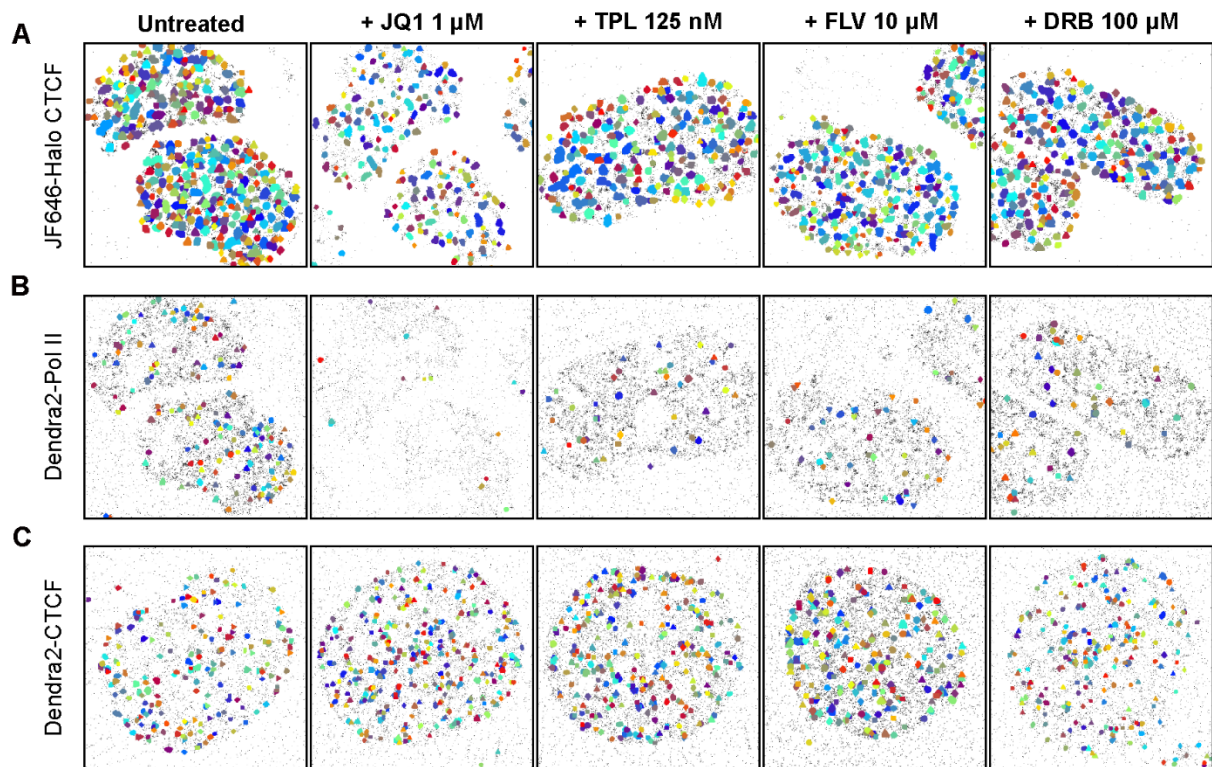

### Supplementary Figure S8

Representative DBSCAN results of (A) JF646-Halo-CTCF, (B) Dendra2-Pol II clusters, and (C) Dendra2-CTCF in cell nuclei before and after treatment with JQ1 (1  $\mu$ M, 2 hr), triptolide (TPL; 125 nM, 2 hr), flavopiridol (FLV; 10  $\mu$ M, 2 hr), and DRB (100  $\mu$ M, 2 hr). The matched super-resolved color code images are shown in Figure 5A and 5B.



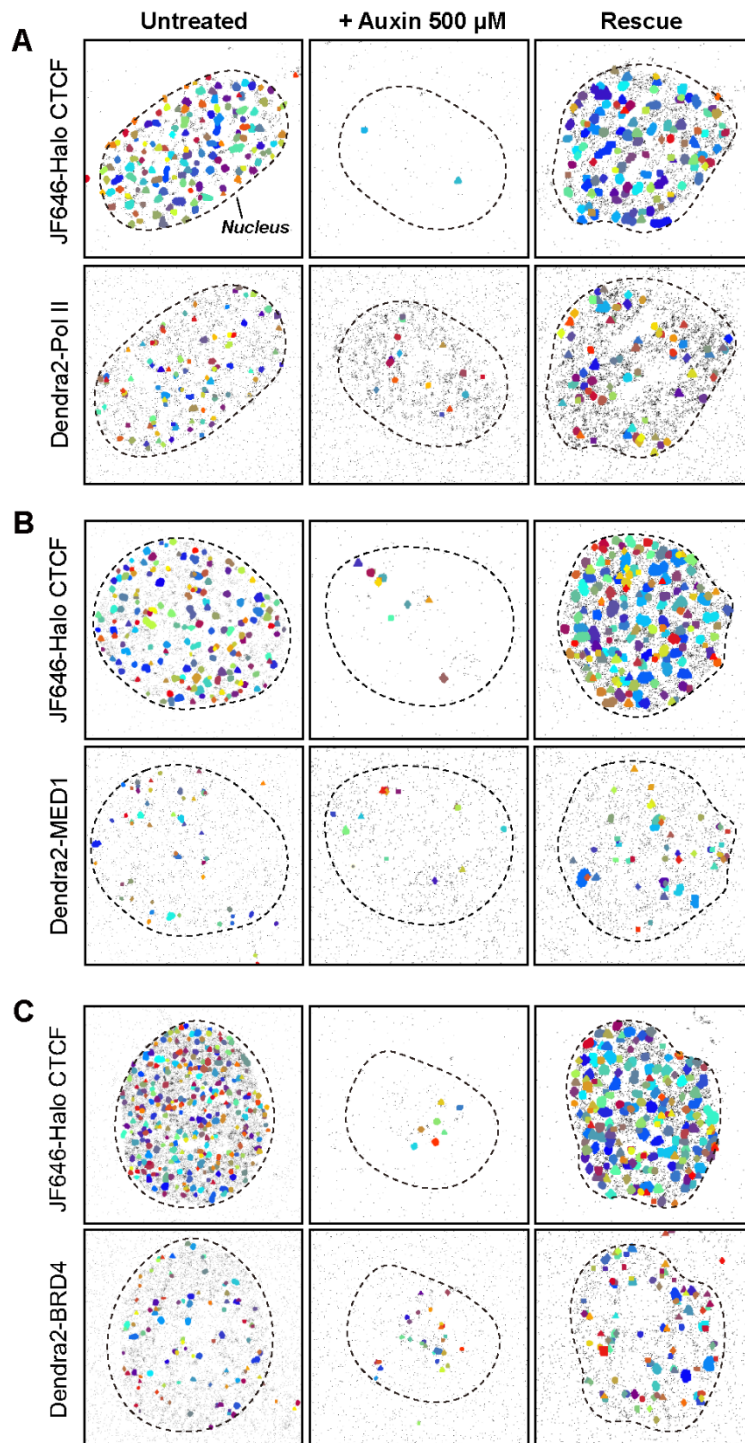

### Supplementary Figure S9

Representative DBSCAN results of JF646-Halo-CTCF/Dendra2-Pol II cells (A), JF646-Halo-CTCF/Dendra2-MED1 cells (B), and JF646-Halo-CTCF/Dendra2-BRD4 cells (C) before and

after auxin treatment. The matched super-resolved color code images are shown in Figure 6B, 6F, and 6J, respectively.

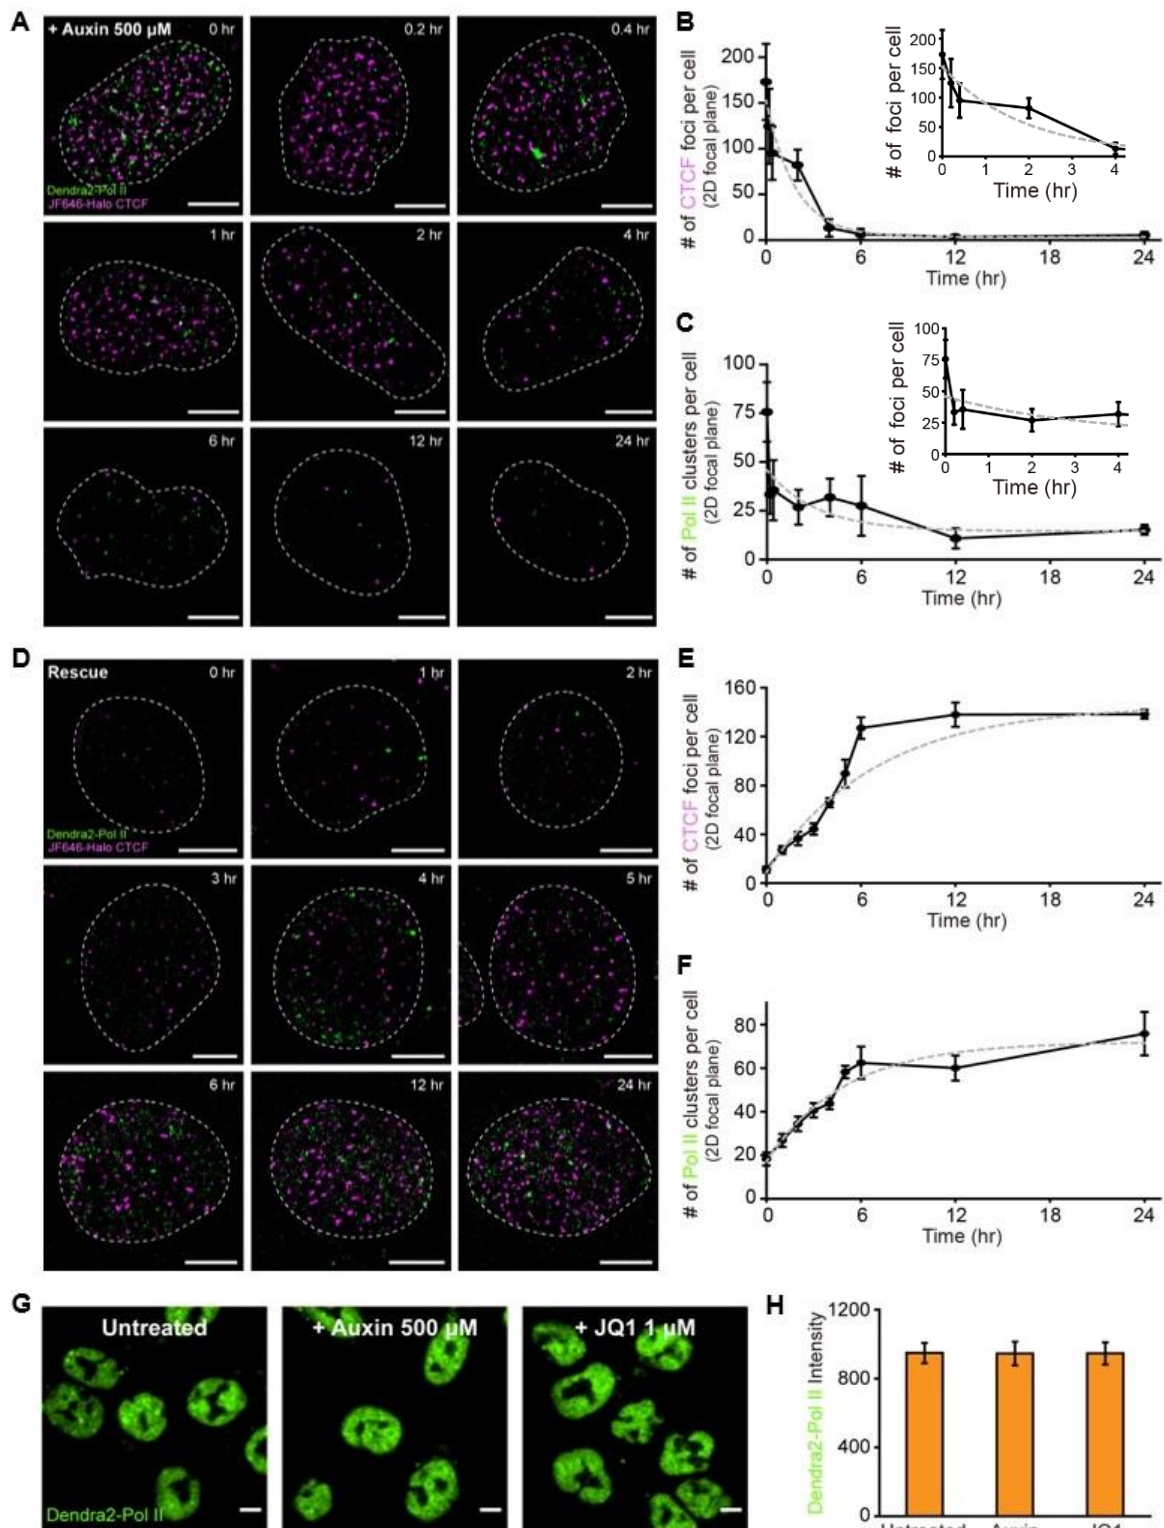

Supplementary Figure S10

(A) Representative super-resolved images of JF646-CTCF (magenta) and Dendra2-Pol II (green) clusters per cell over time after auxin treatment. (B and C) Time course curves for

number of (B) CTCF clusters and (C) Pol II clusters per cell after auxin treatment. Insets represent rapid decreases in the number of clusters until 4 hours after auxin treatment. **(D)** Representative super-resolved images of JF646-CTCF (magenta) and Dendra2-Pol II (green) clusters over time after auxin removal. **(E and F)** Time course curves for number of (E) CTCF clusters and (F) Pol II clusters per cell after auxin removal.  $N = 11.6 (\pm 1.2)$  cells were analyzed for each time point for line graphs. **(G)** Representative fluorescence images of the Halo-CTCF/Dendra2-Pol II cell line upon excitation with a 488-nm laser. Fluorescence signals in nuclei indicate expression of Dendra2-Pol II in (left) untreated cells, (middle) auxin-treated cells (500  $\mu\text{M}$  for 24 hr), and (right) JQ1-treated cells (1  $\mu\text{M}$  for 2 hr). **(H)** Comparison of fluorescence intensities of nuclei among untreated, auxin-treated, and JQ1-treated cells. The intensities in the y-axis are arbitrary numbers. All scale bars represent 5  $\mu\text{m}$ .



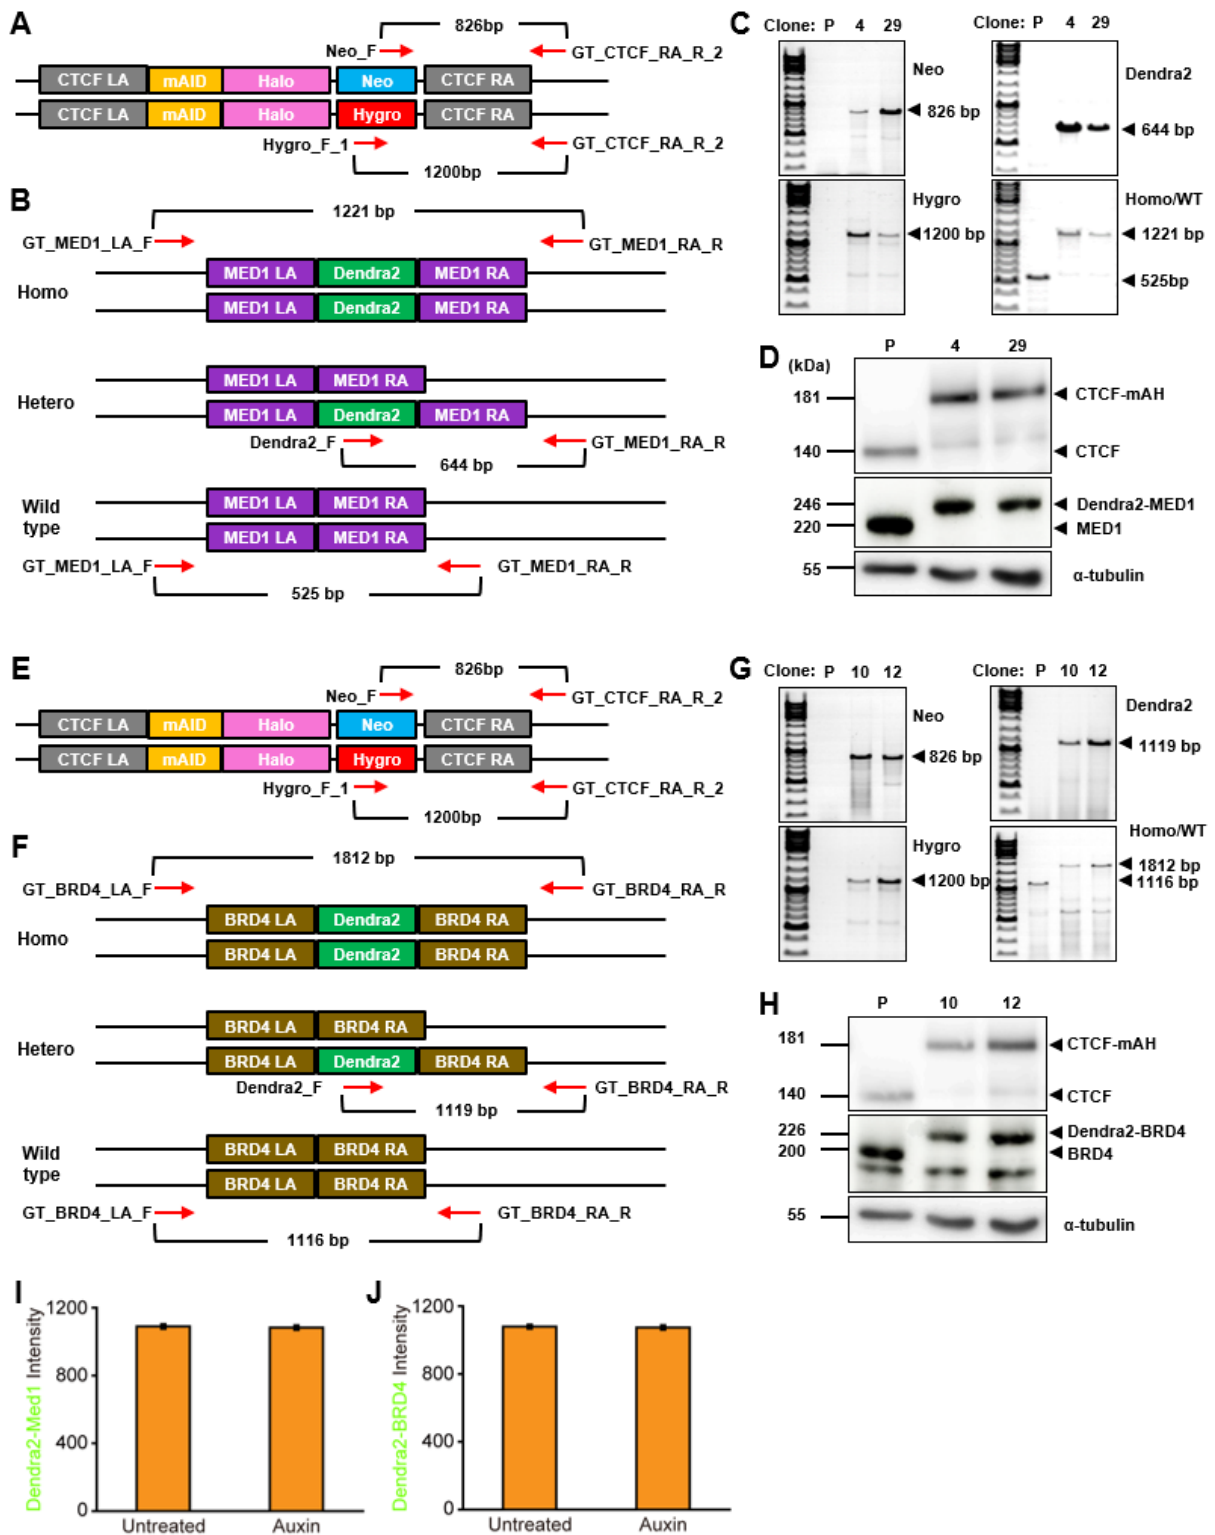

Supplementary Figure S11

(A) Schematic diagram of genotyping by PCR to identify successful knock-in of the mAID-Halo cassette to the C-terminus of human *CTCF* before the stop codon in both alleles of

HCT116 cells. Primer sets and expected PCR products are shown. **(B)** Schematic diagram of genotyping by PCR to identify successful knock-in of Dendra2 to the N-terminus of human *MED1* before the start codon in both alleles of HCT116 cells. Primer sets and expected PCR products are shown. **(C)** Genomic PCR to test the genotype of clones after selection. P: Parental cells (HCT116/CMV-OsTIR1). **(D)** Immunoblotting analysis for CTCF and MED1 to identify the CTCF-mAID-Halo (CTCF-mAH) and Dendra2-MED1 fusion protein. Parental cells: HCT116/CMV-OsTIR1. **(E)** Schematic diagram of genotyping by PCR to identify successful knock-in of the mAID-Halo cassette to the C-terminus of human *CTCF* before the stop codon in both alleles of HCT116 cells. Primer sets and expected PCR products are shown. **(F)** Schematic diagram of genotyping by PCR to identify successful knock-in of Dendra2 to the N-terminus of human *BRD4* before the start codon in both alleles of HCT116 cells. Primer sets and expected PCR products are shown. **(G)** Genomic PCR to test the genotype of clones after selection. P: Parental cells (HCT116/CMV-OsTIR1). **(H)** Immunoblotting analysis for CTCF and BRD4 to identify the CTCF-mAID-Halo (CTCF-mAH) and Dendra2-BRD4 fusion protein. Parental cells: HCT116/CMV-OsTIR1. **(I-J)** Fluorescence intensities in cell nuclei for (I) Dendra2-MED1 and (J) Dendra2-BRD4 before and after auxin treatment (500  $\mu$ M for 24 hr) upon excitation with a 488-nm laser. The intensities in the y-axis are arbitrary numbers.

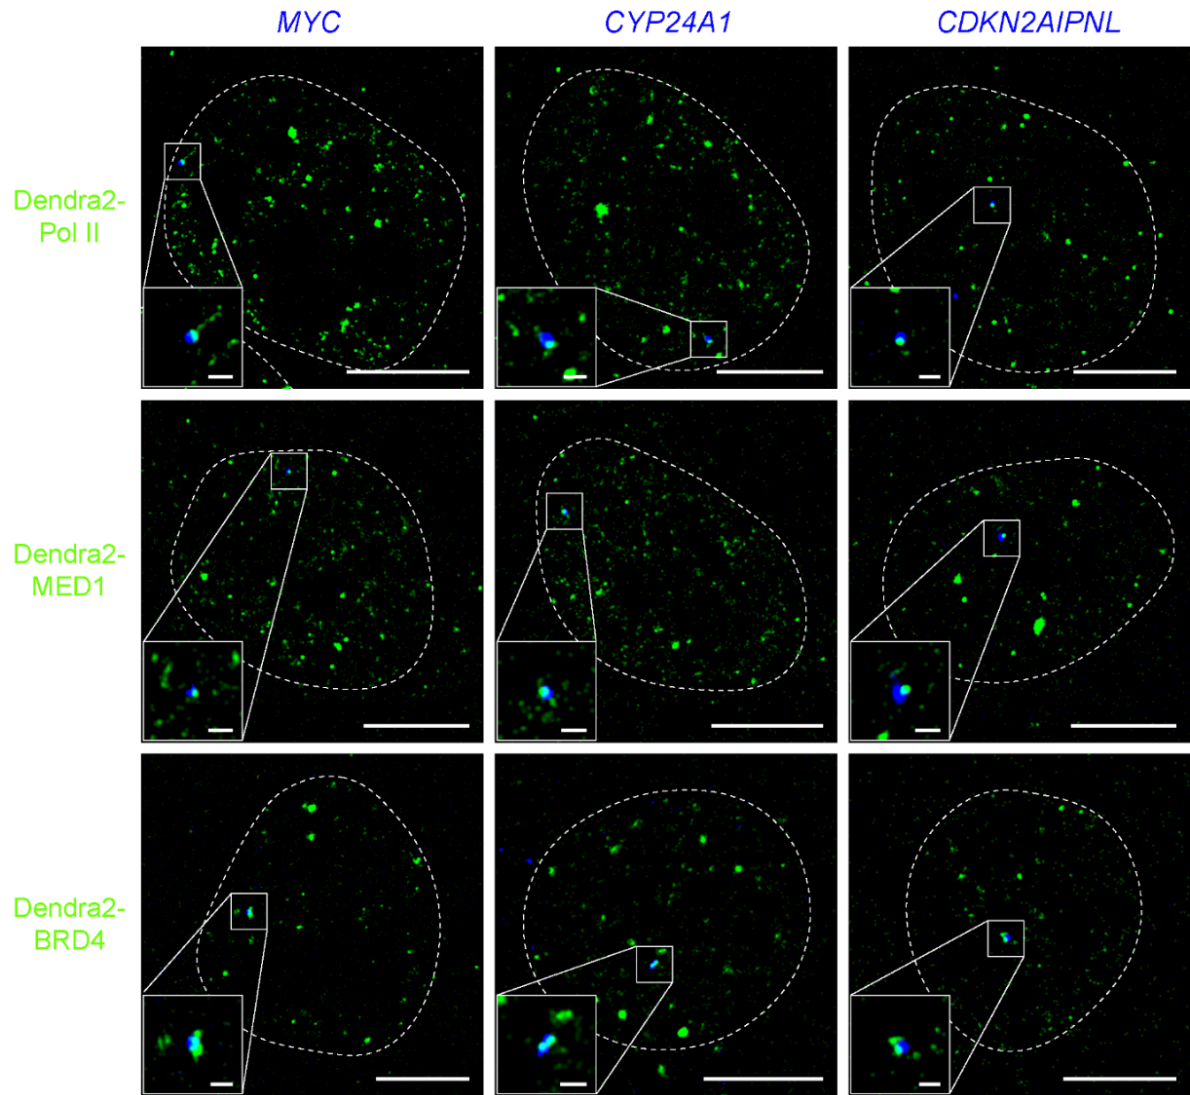

### Supplementary Figure S12

Representative super-resolved colocalization images to address transcriptional condensates associated with active genes. RNA FISH was used for capturing nascent transcription loci for *MYC*, *CYP24A1*, and *CDKN2AIPNL* genes (left to right). Pol II/BRD4/MED1 clusters were colocalized with the nascent gene loci.

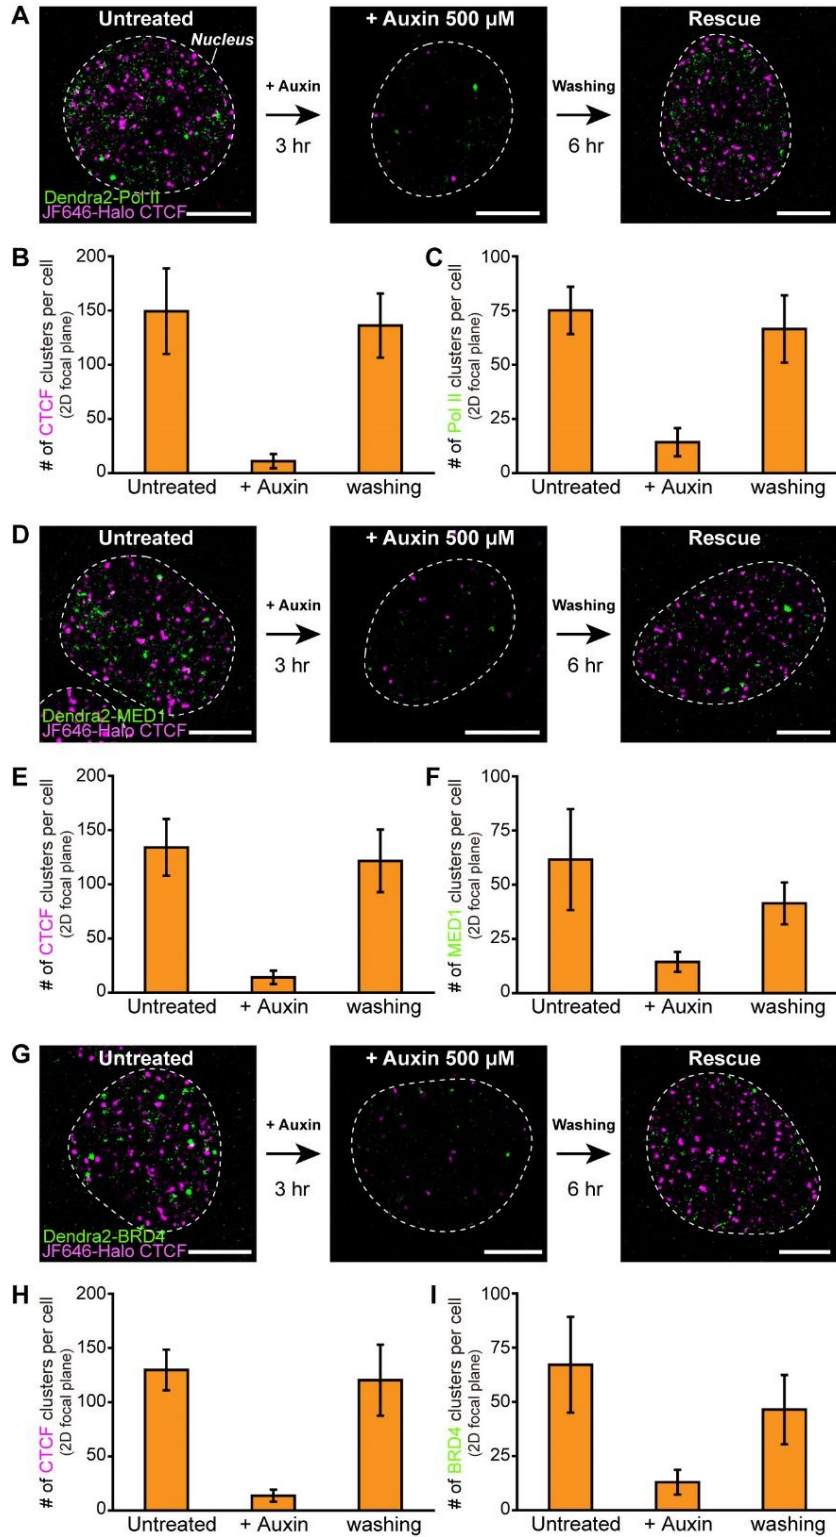

### Supplementary Figure S13

(A, D, G) Representative dual-color super-resolved images of (A) Pol II, (D) MED1, and (G) BRD4 clusters, along with CTCF clusters, upon CTCF degradation with 3-hr auxin treatment

and restoration with 6-hr auxin removal. **(B, E, H)** Numbers of CTCF clusters per cell per 2D-focal plane for each cell line. **(C, F, I)** Numbers of **(C)** Pol II, **(F)** MED1, and **(I)** BRD4 clusters per cell per 2D-focal plane upon CTCF degradation and restoration. Auxin (500  $\mu$ M) was treated for 3 hr for CTCF degradation and washed out for 6 hr for CTCF restoration. The results are consistent with degradation and restoration for 24 hrs (**Figure 6**). Scale bars represent 5  $\mu$ m. N = 18 ( $\pm$ 3.4) cells, in average, were analyzed for each cell line.

**Table S1. List of oligonucleotides used in the study**

| <b>Primers used for amplification of gene construct</b> |                                         |                                                |
|---------------------------------------------------------|-----------------------------------------|------------------------------------------------|
| <b>Name</b>                                             | <b>Description</b>                      | <b>Sequence (5'-3')</b>                        |
| <b>CTCF_500bp_F</b>                                     | Amplifying CTCF HR arm from genomic DNA | gaaactagtCTAAAAGACCCTTGTGATTCTTGG              |
| <b>CTCF_500bp_R</b>                                     | Amplifying CTCF HR arm from genomic DNA | gaaggtaccCACTGTCCTCAGCACTTAC                   |
| <b>XhoI_F</b>                                           | Amplifying BRD4 HR arm Gene block       | gaaattaacgcacgctcgCT                           |
| <b>KpnI_R</b>                                           | Amplifying BRD4 HR arm Gene block       | tatgctacgctacgctacgc                           |
| <b>SpeI_F</b>                                           | Amplifying MED1 HR arm Gene block       | gaaattaacgcacgctcgACT                          |
| <b>KpnI_R</b>                                           | Amplifying MED1 HR arm Gene block       | tatgctacgctacgctacgc                           |
| <b>Halo_F</b>                                           | Amplifying HaloTag                      | gaagctagcATGGCAGAAATCGGTA                      |
| <b>Halo_R</b>                                           | Amplifying HaloTag                      | gaatctagaGCCGGAAATCTCGAGC                      |
| <b>BamHI_Dendra2_F</b>                                  | Amplifying Dendra2 gene                 | gaaggtaccATGAACACCCCG                          |
| <b>BamHI_Dendra2_R</b>                                  | Amplifying Dendra2 gene                 | cttgatccTTACCACACCTGG                          |
| <b>Primers used for sgRNAs</b>                          |                                         |                                                |
| <b>Name</b>                                             | <b>Description</b>                      | <b>Sequence (5'-3')</b>                        |
| <b>CTCF_sgR_F_02</b>                                    | guide RNA targeting CTCF locus          | caccgTCAGCATGATGGACCCGGTGA                     |
| <b>CTCF_sgR_R_02</b>                                    | guide RNA targeting CTCF locus          | aaacTCACCCGGTCCATCATGCTGAc                     |
| <b>BRD4_sgRNA_F</b>                                     | guide RNA targeting BRD4 locus          | caccgTGGGATCACTAGCATGTCTG                      |
| <b>BRD4_sgRNA_R</b>                                     | guide RNA targeting BRD4 locus          | aaacCAGACATGCTAGTGATCCAc                       |
| <b>MED1_sgRNA_F</b>                                     | guide RNA targeting MED1 locus          | caccgCTTCAGGATGAAAGCTCAGG                      |
| <b>MED1_sgRNA_R</b>                                     | guide RNA targeting MED1 locus          | aaacCCTGAGCTTTCATCCTGAAGc                      |
| <b>Primers used for genotyping</b>                      |                                         |                                                |
| <b>Name</b>                                             | <b>Description</b>                      | <b>Sequence (5'-3')</b>                        |
| <b>GT_CTCF_RA_R_2</b>                                   | Genotyping                              | CTCCAAGCAAAGGGAGTCAG                           |
| <b>CTCF_1kb_Set3_F</b>                                  | Genotyping                              | GAAACTAGTTCACCTGAGGTCAGTAGTCC                  |
| <b>RPB1_outLA_F</b>                                     | Genotyping                              | CCGTAACCTCTGCCGTTTCAG                          |
| <b>RPB1_R_2</b>                                         | Genotyping                              | CCTGGCCCGTCACCCATAAG                           |
| <b>GT_BRD4_LA_F</b>                                     | Genotyping                              | GTGGGAAAAGGGATGTGCAG                           |
| <b>GT_BRD4_RA_R</b>                                     | Genotyping                              | GGTGACAGTGACGATGATGC                           |
| <b>GT_MED1_LA_F</b>                                     | Genotyping                              | TTTCGATGCCCTGTCCCTCTT                          |
| <b>GT_MED1_RA_R</b>                                     | Genotyping                              | CAAAAGTGCCCTAGTCCGAGC                          |
| <b>Neo_F</b>                                            | Genotyping                              | AATGGGCTGACCGCTTCCTC                           |
| <b>Hygro_F_1</b>                                        | Genotyping                              | ACTGTCGGGCGTACACAAAT                           |
| <b>Dendra2_F</b>                                        | Genotyping                              | TGCACCATCCGCAGCGACAT                           |
| <b>Primers used for mutagenesis</b>                     |                                         |                                                |
| <b>Name</b>                                             | <b>Description</b>                      | <b>Sequence (5'-3')</b>                        |
| <b>CTCF_SB_F_02</b>                                     | Site-directed mutagenesis               | GATCCTCtCATGATGGACCGgGATccCGGAGCCTTGTGCGTCGCC  |
| <b>CTCF_SB_R_02</b>                                     | Site-directed mutagenesis               | GGCGACGCACAAGGCTCCGgATCccCGGTCATCATCggaGAGGATC |

| <b>Primers used for RT-qPCR</b> |                    |                         |
|---------------------------------|--------------------|-------------------------|
| <b>Name</b>                     | <b>Description</b> | <b>Sequence (5'-3')</b> |
| <b>GAPDH_F</b>                  | qRT-PCR            | AGGGCTGCTTTTAACTCTGGT   |
| <b>GAPDH_R</b>                  | qRT-PCR            | CCCCACTTGATTTTGGAGGGA   |
| <b>IRS1_F</b>                   | qRT-PCR            | CTCAACTGGACATCACAGCAG   |
| <b>IRS1_R</b>                   | qRT-PCR            | TGAAATGGATGCATCGTACC    |
| <b>MYC_F</b>                    | qRT-PCR            | CTGCTTAGACGCTGGATT      |
| <b>MYC_R</b>                    | qRT-PCR            | GTCGTAGTCGAGGTCATAGT    |
| <b>IER5L_F</b>                  | qRT-PCR            | TGGTCAGCTGTGGTGTGTTGT   |
| <b>IER5L_R</b>                  | qRT-PCR            | TCTCACAGGCTCGAACAATG    |

**Supplementary Table S2. Summary of Hi-C data used in this study.**

|                                      | <b>Clone I<br/>Auxin-</b> | <b>Clone M<br/>Auxin-</b> | <b>Merge<br/>Auxin-</b> | <b>Clone I<br/>Auxin+</b> | <b>Clone M<br/>Auxin+</b> | <b>Merge<br/>Auxin+</b> |
|--------------------------------------|---------------------------|---------------------------|-------------------------|---------------------------|---------------------------|-------------------------|
| <b>Total_pairs_processed</b>         | 216,229,102               | 234,403,906               | 450,633,008             | 228,359,744               | 245,326,175               | 473,685,919             |
| <b>Unmapped_pairs</b>                | 3,240,560                 | 4,519,362                 | 7,759,922               | 4,609,648                 | 4,831,234                 | 9,440,882               |
| <b>Low_qual_pairs</b>                | 70,081,835                | 74,396,373                | 144,478,208             | 74,348,409                | 78,772,354                | 153,120,763             |
| <b>Unique_paired_alignments</b>      | 125,267,707               | 135,638,164               | 260,905,871             | 130,566,210               | 141,130,535               | 271,696,745             |
| <b>Multiple_pairs_alignments</b>     | 0                         | 0                         | 0                       | 0                         | 0                         | 0                       |
| <b>Pairs_with_singleton</b>          | 17,639,000                | 19,850,007                | 37,489,007              | 18,835,477                | 20,592,052                | 39,427,529              |
| <b>Low_qual_singleton</b>            | 0                         | 0                         | 0                       | 0                         | 0                         | 0                       |
| <b>Unique_singleton_alignments</b>   | 0                         | 0                         | 0                       | 0                         | 0                         | 0                       |
| <b>Multiple_singleton_alignments</b> | 0                         | 0                         | 0                       | 0                         | 0                         | 0                       |
| <b>Reported_pairs</b>                | 125,267,707               | 135,638,164               | 260,905,871             | 130,566,210               | 141,130,535               | 271,696,745             |
| <b>valid_interaction</b>             | 103,587,750               | 104,346,481               | 207,934,231             | 100,318,546               | 107,088,148               | 207,406,694             |
| <b>valid_interaction_rmdup</b>       | 92,976,103                | 86,848,111                | 179,821,709             | 85,625,812                | 90,424,045                | 176,046,966             |
| <b>trans_interaction</b>             | 13,402,832                | 20,209,400                | 33,612,160              | 14,178,137                | 17,316,844                | 31,494,896              |
| <b>cis_interaction</b>               | 79,573,271                | 66,638,711                | 146,209,549             | 71,447,675                | 73,107,201                | 144,552,070             |
| <b>cis_shortRange</b>                | 24,103,745                | 18,146,473                | 42,248,009              | 21,102,614                | 22,106,989                | 43,206,975              |
| <b>cis_longRange</b>                 | 55,469,526                | 48,492,238                | 103,961,540             | 50,345,061                | 51,000,212                | 101,345,095             |



**Supplementary Table S3. Summary of Pol II HiChIP data used in this study.**

|                                      | <b>Clone I<br/>Auxin-</b> | <b>Clone M<br/>Auxin-</b> | <b>Merge<br/>Auxin-</b> | <b>Clone I<br/>Auxin+</b> | <b>Clone M<br/>Auxin+</b> | <b>Merge Auxin+</b> |
|--------------------------------------|---------------------------|---------------------------|-------------------------|---------------------------|---------------------------|---------------------|
| <b>Total_pairs_processed</b>         | 213,041,509               | 231,927,353               | 444,968,862             | 224,790,327               | 215,670,701               | 440,461,028         |
| <b>Unmapped_pairs</b>                | 6,884,110                 | 3,501,502                 | 10,385,612              | 3,999,873                 | 3,061,895                 | 7,061,768           |
| <b>Low_qual_pairs</b>                | 85,874,138                | 78,321,900                | 164,196,038             | 77,784,991                | 71,041,074                | 148,826,065         |
| <b>Unique_paired_alignments</b>      | 105,117,431               | 132,167,165               | 237,284,596             | 126,822,036               | 127,909,629               | 254,731,665         |
| <b>Multiple_pairs_alignments</b>     | 0                         | 0                         | 0                       | 0                         | 0                         | 0                   |
| <b>Pairs_with_singleton</b>          | 15,165,830                | 17,936,786                | 33,102,616              | 16,183,427                | 13,658,103                | 29,841,530          |
| <b>Low_qual_singleton</b>            | 0                         | 0                         | 0                       | 0                         | 0                         | 0                   |
| <b>Unique_singleton_alignments</b>   | 0                         | 0                         | 0                       | 0                         | 0                         | 0                   |
| <b>Multiple_singleton_alignments</b> | 0                         | 0                         | 0                       | 0                         | 0                         | 0                   |
| <b>Reported_pairs</b>                | 105,117,431               | 132,167,165               | 237,284,596             | 126,822,036               | 127,909,629               | 254,731,665         |
| <b>valid_interaction</b>             | 79,169,952                | 98,286,511                | 177,456,463             | 100,771,751               | 104,973,964               | 205,745,715         |
| <b>valid_interaction_rmdup</b>       | 59,117,595                | 82,333,628                | 141,445,796             | 83,526,840                | 89,992,877                | 173,514,102         |
| <b>trans_interaction</b>             | 8,919,522                 | 12,277,453                | 21,196,956              | 11,681,173                | 13,050,054                | 24,731,205          |
| <b>cis_interaction</b>               | 50,198,073                | 70,056,175                | 120,248,840             | 71,845,667                | 76,942,823                | 148,782,897         |
| <b>cis_shortRange</b>                | 18,806,729                | 29,190,739                | 47,992,207              | 24,292,226                | 24,670,834                | 48,957,780          |
| <b>cis_longRange</b>                 | 31,391,344                | 40,865,436                | 72,256,633              | 47,553,441                | 52,271,989                | 99,825,117          |

**Table S4. Reagents or resources used in this study.**

| REAGENT or RESOURCE                                      | SOURCE                | IDENTIFIER         |
|----------------------------------------------------------|-----------------------|--------------------|
| <b>Antibodies</b>                                        |                       |                    |
| Rabbit polyclonal anti-CTCF                              | CST                   | Cat# 2899          |
| Rabbit polyclonal anti-SMC1                              | Bethyl Laboratories   | Cat# A300-055A     |
| Rabbit polyclonal anti-H3K27ac                           | Abcam                 | Cat# ab4729        |
| Rabbit monoclonal anti-Phospho-Rpb1 CTD                  | CST                   | Cat# 13523         |
| Rabbit polyclonal anti-BRD4                              | Bethyl Laboratories   | Cat# A301-985A100  |
| Mouse monoclonal anti- $\alpha$ -Tubulin                 | Santa Cruz            | Cat# sc-32293      |
| Rabbit polyclonal anti-MED1                              | Bethyl Laboratories   | Cat# A300-793A     |
| Mouse monoclonal anti-RPB1                               | Abcam                 | Cat# ab5408        |
| HRP-linked anti-Rabbit IgG                               | CST                   | Cat# 7074          |
| HRP-linked anti-Mouse IgG                                | CST                   | Cat# 7076          |
| <b>Chemicals, Peptides, and Recombinant Proteins</b>     |                       |                    |
| RPMI 1640, 1X, with 2.05mM L-Glutamine                   | HyClone               | Cat# SH30027.01    |
| Fetal bovine serum                                       | HyClone               | Cat# SH30071.03    |
| Penicillin-Streptomycin solution                         | HyClone               | Cat# SV30010       |
| DMEM with HEPES and without phenol red                   | Gibco                 | Cat# 21063-029     |
| Fetal bovine serum, Canada Origin                        | Gibco                 | Cat# 12483-020     |
| Penicillin-Streptomycin solution                         | Gibco                 | Cat# 15140-122     |
| Trypsin-EDTA (0.05%), phenol red                         | Gibco                 | Cat# 25300062      |
| Phosphate buffered saline                                | Gibco                 | Cat# 10010-023     |
| Leibovitz's L-15 medium, no phenol red                   | Gibco                 | Cat# 21083-027     |
| 4% Paraformaldehyde solution                             | Biosesang             | Cat# PC2031-050-00 |
| JQ1                                                      | Sigma-Aldrich         | Cat# SML0974       |
| Triptolide                                               | Sigma-Aldrich         | Cat# T3652         |
| Flavopiridol hydrochloride hydrate                       | Sigma-Aldrich         | Cat# F3055         |
| 5,6-Dichlororo-1- $\beta$ -D-ribofuranosyl-benzimidazole | Sigma-Aldrich         | Cat# D1916         |
| Dimethyl sulfoxide                                       | Sigma-Aldrich         | Cat# D8418         |
| 1,6-Hexandiol                                            | Sigma-Aldrich         | Cat# 240117        |
| Janelia Fluor® HaloTag® Ligands                          | Promega               | Cat# GA1120        |
| Q5® High-Fidelity DNA Polymerase                         | New England Biolabs   | Cat# M0491L        |
| Hybrid-R™ RNA purification kit                           | GeneAll Biotechnology | Cat# 305-101       |
| PrimeScript™ RT Master Mix                               | Takara Bio            | Cat# RR036A        |
| QuantiNova™ SYBR® Green PCR Kit                          | QIAGEN                | Cat# 208052        |
| T-PER Tissue Protein Extraction Reagent                  | Thermo Scientific     | Cat# 78510         |
| Halt™ Protease and Phosphatase Inhibitor Cocktail        | Thermo Scientific     | Cat# 78440         |
| Protein Assay Dye Reagent Concentrate                    | Bio-Rad               | Cat# 5000006       |
| Pierce™ ECL Western Blotting Substrate                   | Thermo Scientific     | Cat# 32106         |
| Pierce™ ECL Plus Western Blotting Substrate              | Thermo Scientific     | Cat# 32132         |
| Supersignal™ West Femto Maximum Sensitivity Substrate    | Thermo Scientific     | Cat# 34096         |
| Annexin V Apoptosis Detection Kit                        | eBioscience           | Cat# 88-8007-74    |
| formaldehyde solution                                    | Sigma                 | Cat# F8775         |
| Dynabeads™ protein A                                     | Invitrogen            | Cat# 100.02D       |
| Dynabeads™ protein G                                     | Invitrogen            | Cat# 100.04D       |
| Proteinase K, Molecular Biology Grade                    | New England Biolabs   | Cat# P8107S        |

|                                                     |                                            |                                                                                                                                                 |
|-----------------------------------------------------|--------------------------------------------|-------------------------------------------------------------------------------------------------------------------------------------------------|
| AMPure XP                                           | Beckman Coulter                            | Cat# A63881                                                                                                                                     |
| Nextera DNA Library Preparation Kit                 | illumina                                   | Cat# 15028212                                                                                                                                   |
| KAPA HiFi HotStart ReadyMix PCR Kit                 | KAPA Biosystems                            | Cat# KK2602                                                                                                                                     |
| DpnII                                               | New England Biolabs                        | Cat# R0543                                                                                                                                      |
| NEBuffer3.1                                         | New England Biolabs                        | Cat# B7203S                                                                                                                                     |
| biotin-14-dATP                                      | Jena bioscience                            | Cat# NU-835-BIO14-S                                                                                                                             |
| dCTP (100mM)                                        | Invitrogen                                 | Cat# 10217016                                                                                                                                   |
| dGTP (100mM)                                        | Invitrogen                                 | Cat# 10218014                                                                                                                                   |
| dTTP (100mM)                                        | Invitrogen                                 | Cat# 10219012                                                                                                                                   |
| DNA Polymerase I , Large (Klenow) Fragment          | New England Biolabs                        | Cat# M0210L                                                                                                                                     |
| T4 DNA Ligase Reaction buffer                       | New England Biolabs                        | Cat# B0202S                                                                                                                                     |
| T4 DNA Ligase                                       | New England Biolabs                        | Cat# M0202S                                                                                                                                     |
| Dynabeads™ MyOne™ Streptavidin C1                   | Invitrogen                                 | Cat# 65001                                                                                                                                      |
| e-Myco™ Mycoplasma PCR Detection kit (ver. 2.0)     | iNtRON                                     | Cat# 25235                                                                                                                                      |
| FuGENE HD® Transfection Reagent                     | Promega                                    | Cat# 2311                                                                                                                                       |
| G418 disulfate salt                                 | Sigma                                      | Cat# A1720                                                                                                                                      |
| Hygromycin B from <i>Streptomyces hygroscopicus</i> | Sigma                                      | Cat# H3274                                                                                                                                      |
| Blasticidin                                         | InvivoGen                                  | Cat# ant-bi-05                                                                                                                                  |
| Indole-3-acetic acid sodium salt                    | Sigma                                      | Cat# I5148                                                                                                                                      |
| Propidium iodide solution                           | Sigma                                      | Cat# P4864                                                                                                                                      |
| Phenol:Chloroform:Isoamyl Alcohol                   | Sigma                                      | Cat# P3803                                                                                                                                      |
| <b>Recombinant DNA</b>                              |                                            |                                                                                                                                                 |
| pMK289 (mAID-mClover-NeoR)                          | Addgene                                    | Cat# 72827                                                                                                                                      |
| pMK290 (mAID-mClover-Hygro)                         | Addgene                                    | Cat# 72828                                                                                                                                      |
| pSpCas9(BB)-2A-Puro (PX459) V2.0                    | Addgene                                    | Cat# 62988                                                                                                                                      |
| pX330-U6-Chimeric_BB-CBh-hSpCas9                    | Addgene                                    | Cat# 42230                                                                                                                                      |
| pTK600                                              | Addgene                                    | Cat# 114696                                                                                                                                     |
| pDendra2-C                                          | Clontech                                   | Cat# 632546                                                                                                                                     |
| pUC19                                               | Addgene                                    | Cat# 50005                                                                                                                                      |
| <b>Materials for imaging</b>                        |                                            |                                                                                                                                                 |
| 35mm glass bottom dish                              | Cellvis                                    | Cat# D35-25-1.5-N                                                                                                                               |
| ECLIPSE Ti2-E main body                             | Nikon                                      | Cat# MEA54000                                                                                                                                   |
| OBIS 405 nm LX 50 mW                                | Coherent                                   | Cat# 1284369                                                                                                                                    |
| OBIS 561 nm LS 150 mW                               | Coherent                                   | Cat# 1280720                                                                                                                                    |
| OBIS 640 nm LX 100 mW                               | Coherent                                   | Cat# 1185055                                                                                                                                    |
| <b>Software and Algorithms</b>                      |                                            |                                                                                                                                                 |
| MTT                                                 | <a href="#">Serge et al., 2008</a>         | <a href="https://github.com/cisselab/qSR">https://github.com/cisselab/qSR</a>                                                                   |
| qSR                                                 | <a href="#">Andrews et al., 2018</a>       | <a href="https://github.com/cisselab/qSR">https://github.com/cisselab/qSR</a>                                                                   |
| HaMMY                                               | <a href="#">Mckinney et al., 2006</a>      | <a href="http://ha.med.jhmi.edu/resources/#1464200861600-0fad9996-bfd4">http://ha.med.jhmi.edu/resources/#1464200861600-0fad9996-bfd4</a>       |
| Hic-pro v2.11.4                                     | <a href="#">Servant et al., 2015</a>       | <a href="https://github.com/nservant/HiC-Pro">https://github.com/nservant/HiC-Pro</a>                                                           |
| coolpup.py v0.9.5                                   | <a href="#">Flyamer et al., 2020</a>       | <a href="https://github.com/open2c/coolpuppy">https://github.com/open2c/coolpuppy</a>                                                           |
| Juicer tools v1.22.01                               | <a href="#">Durand et al., 2016</a>        | <a href="https://github.com/aidenlab/juicer/wiki/Juicer-Tools-Quick-Start">https://github.com/aidenlab/juicer/wiki/Juicer-Tools-Quick-Start</a> |
| HiCEXplorer v3.4.3                                  | <a href="#">Ramirez et al., 2018</a>       | <a href="https://hicexplorer.readthedocs.io/en/latest">https://hicexplorer.readthedocs.io/en/latest</a>                                         |
| Fit-hichip v8.0                                     | <a href="#">Bhattacharyya et al., 2018</a> | <a href="https://github.com/ay-lab/FitHiChIP">https://github.com/ay-lab/FitHiChIP</a>                                                           |
| STAR v2.6.0a                                        | <a href="#">Dobin et al., 2013</a>         | <a href="https://github.com/alexdobin/STAR">https://github.com/alexdobin/STAR</a>                                                               |

|                         |                               |                                                                                                                           |
|-------------------------|-------------------------------|---------------------------------------------------------------------------------------------------------------------------|
| RSEM v.1.2.31           | <u>Li and Dewey, 2011</u>     | <a href="https://deweylab.github.io/RSEM/">https://deweylab.github.io/RSEM/</a>                                           |
| DESeq2 v1.26.0          | <u>Love et al., 2014</u>      | <a href="https://doi.org/10.18129/B9.bioc.DESeq2">https://doi.org/10.18129/B9.bioc.DESeq2</a>                             |
| trim_galore v0.6.4      | Babraham Bioinformatics       | <a href="https://github.com/FelixKrueger/TrimGalore">https://github.com/FelixKrueger/TrimGalore</a>                       |
| bwa v0.7.17             | <u>Li an Durbin, 2010</u>     | <a href="https://github.com/lh3/bwa">https://github.com/lh3/bwa</a>                                                       |
| SAMtools v1.9           | <u>Li et al., 2009</u>        | <a href="http://samtools.sourceforge.net">http://samtools.sourceforge.net</a>                                             |
| Picard v2.18.23         | Broad Institute               | <a href="https://github.com/broadinstitute/picard">https://github.com/broadinstitute/picard</a>                           |
| deeptools v3.4.3        | <u>Ramírez et al., 2016</u>   | <a href="https://github.com/deeptools/deepTools/">https://github.com/deeptools/deepTools/</a>                             |
| MACS2 v2.2.7.1          | <u>Zhang et al., 2008</u>     | <a href="https://github.com/taoliu/MACS">https://github.com/taoliu/MACS</a>                                               |
| 3DChromatin_ReplicateQC | <u>Yardminci et al., 2017</u> | <a href="https://github.com/kundajelab/3DChromatin_ReplicateQC">https://github.com/kundajelab/3DChromatin_ReplicateQC</a> |
| FlowJo v10.5.3          | FlowJo LLC                    | <a href="https://www.flowjo.com/">https://www.flowjo.com/</a>                                                             |
| GraphPad Prism v5.03    | GraphPad Software Inc.        | <a href="https://www.graphpad.com/">https://www.graphpad.com/</a>                                                         |
| cooltools v0.3.2        | Venev et al. 2019             | <a href="https://github.com/open2c/cooltools">https://github.com/open2c/cooltools</a>                                     |
| Fan-c v0.9.10           | <u>Kruse et al., 2020</u>     | <a href="https://github.com/vaquerizaslab/fanc">https://github.com/vaquerizaslab/fanc</a>                                 |
